# Supplementary material for: Automated telemetry reveals age specific differences in flight duration and speed are driven by wind conditions in a migratory songbird
Source: PubMed Central journal article supplement (PMC4537592; doi:10.1186/s40462-015-0046-5), 2015-08-15

1 **Additional file**

2

3 **Automated telemetry reveals age specific differences in flight duration and speed**  
4 **are driven by wind conditions in a migratory songbird**

5

6 **Greg W Mitchell<sup>1,2\*</sup> (Gregory.Mitchell@ec.gc.ca)**

7 **Bradley K Woodworth<sup>1,3</sup> (bwoodwor@uoguelph.ca)**

8 **Philip D Taylor<sup>3,4</sup> (Philip.Taylor@acadiau.ca)**

9 **D Ryan Norris<sup>1</sup> (rnorris@uoguelph.ca)**

10

11 <sup>1</sup> *Department of Integrative Biology, University of Guelph, Guelph, Ontario, Canada N1G 2W1*

12 <sup>2</sup> *Wildlife Research Division, National Wildlife Research Center, Environment Canada, Ottawa,*  
13 *Ontario, Canada, K1H 0H3*

14 <sup>3</sup> *Department of Biology, Acadia University, Wolfville, Nova Scotia, Canada B4P 2R6*

15 <sup>4</sup> *Bird Studies Canada, Port Rowan, Ontario, Canada, N0E 1M0*

16

17 *\*Author for correspondence ([Gregory.Mitchell@ec.gc.ca](mailto:Gregory.Mitchell@ec.gc.ca)).*

18

19 **Keywords:** altitude; aeroecology; airspeed; automated telemetry; crosswinds; flight costs;  
20 groundspeed; migration; songbirds; tailwinds; wind support

|    |                                                     |
|----|-----------------------------------------------------|
| 21 | <b>Contents</b>                                     |
| 22 | <b>1. Automated detection of vanishing bearings</b> |
| 23 | <b>2. Estimation of detection distance</b>          |
| 24 | <b>3. Wind triangles</b>                            |

## 25 **1. Automated detection of vanishing bearings**

26 We measured the approximate vanishing bearings of birds departing on autumn migration from  
27 Kent Is. in 2009 and 2010 using a digital automated telemetry receiving array comprising three  
28 automated receiving stations located on the island (Fig. S1). Each station consisted of four 4-  
29 element Yagi antennas positioned at the top of a telescoping mast that stood 8 m high. All four  
30 antennas were connected to a single automated digital telemetry receiver (Model SRX-600,  
31 Lotek Wireless, Newmarket Ontario). Antennas on the southernmost receiving station were  
32 oriented towards 180°, 210°, 240°, and 270° relative to geographic north (Fig. S1). The middle  
33 and northern-most receiving stations were set-up in the same way but were shifted 10° and 20°  
34 towards the north, respectively. Given the position of the towers on the island this resulted in us  
35 scanning at orientations of 182°, 190°, 203°, 210°, 220°, 233°, 239°, 250°, 262°, 268°, 280°, and  
36 291° relative to the middle tower and assuming a detection distance of 9.8 km (see *Estimate of*  
37 *detection range* and Fig. S3). In 2010 we rotated each tower 10° northward, based on the results  
38 of 2009 (Fig. S2). This resulted in us scanning at orientations of 191°, 200°, 213°, 220°, 230°,  
39 243°, 249°, 260°, 271°, 278°, 280°, and 300° relative to the middle tower and again assuming a  
40 detection distance of 9.8 km.

41 Antennas were numbered from one to four, with one representing the southern-most  
42 facing antenna through to four, representing the northern most facing antenna (Fig. S1).  
43 Receivers were programmed so that antenna one would scan for a single radio frequency for 5.4  
44 s, before switching to antenna two and scanning for the same frequency for 5.4 s and so on to  
45 antenna four. When the fourth antenna was done scanning, the cycle would repeat on the second  
46 and third frequencies before returning to the first. Receivers were synchronized so that antennas  
47 with the same number on each tower were scanning at the same time. This setup meant that all

48 three radio frequencies were scanned for a total of 21.6 s within every 64.8 s interval. Vanishing  
49 bearings were estimated using the last antenna to receive a signal from each departing bird  
50 before they moved out of range of the receivers.

51

## 52 **2. Estimation of detection distance**

53 We estimated the maximum horizontal distances out to which we detected birds as they departed  
54 Kent Is. in 2010, by multiplying a bird's groundspeed (m/s) by the amount of time we recorded a  
55 signal for a bird before it flew out of range of the receiving stations on the island (See [1]). We  
56 measured groundspeed by dividing the distance from the island to the estimated location that it  
57 arrived on the coast by the amount of time it took to reach the coast. This resulted in a median  
58 detection distance of 9.8 km with the 4-element Yagi antennas (Fig. S3). Given that doubling  
59 the number of elements on a Yagi antenna increases the range of the antenna by a factor of  
60 approximately 0.5, we estimate that the 9-element antennas associated with the automated  
61 receiving stations on the coast had detection ranges of approximately 15 km.

62

## 63 **3. Wind triangles**

64 Tail and crosswind components were calculated using a simple vector addition model (Fig. S4).  
65 Both measures simultaneously account for wind speed and direction. In these models, track  
66 direction and groundspeed represent the direction the bird is flying to reach a given destination  
67 relative to the origin and the speed at which they are flying over the ground, respectively. Wind  
68 direction and speed represent the direction the wind is blowing towards (not from) and the speed  
69 at which it is blowing relative to the ground, respectively. Heading direction represents the  
70 direction the bird has to face and fly in order to maintain its track direction relative to the wind.

71   Airspeed represents the bird's flight speed in the absence of any winds.

72       We derived tailwind components using the formula  $V_w \cdot \cos(\beta)$ , where  $V_w$  is wind speed  
73 (m/s) and  $\beta$  is the difference between track and wind directions. Tailwind components can be  
74 either negative or positive and represent the amount that groundspeed along a given flight track  
75 is either reduced (headwinds) or increased (tailwinds), respectively, and has the units (m/s). A  
76 positive tailwind component is illustrated in Figure S4a, where the wind is blowing partly in the  
77 direction the bird is travelling. The net result of this positive tailwind component is an increase  
78 in groundspeed by the amount indicated by the hatched line along the bird's flight track. A  
79 negative tailwind component is illustrated in Figure S4b, where the wind is blowing partly in the  
80 direction from which the bird originated, resulting in a negative tailwind component and a  
81 reduction in groundspeed by an amount indicated by the hatched line associated with the bird's  
82 flight track. We derived crosswind components using the formula  $V_w \cdot \sin(\beta)$ . The crosswind  
83 component also has the units m/s. With this measure, increasingly negative and positive  
84 crosswind components both represent increasingly strong side winds (winds blowing  
85 perpendicular to an individual's track direction); therefore, crosswind components always take  
86 on absolute positive values. The crosswind component in Fig. S4 is the same in both panels.

87 **REFERENCES**

88

89 1. Mitchell GW, Newman AE, Wikelski M, Norris DR. Timing of breeding carries over to  
90 influence migratory departure in a songbird: an automated radiotracking study. *J Anim Ecol.*  
91 2012;81:1024-1033.

92

93 2. Dodge S, Bohrer G, Weinzierl R, Davidson SC, Kays R, Douglas D, Cruz S, Hans J, Brandes  
94 D, Wikelski M. The environmental-data automated track annotation (Env-DATA) system:  
95 linking animal tracks with environmental data. *Movement Ecology.* 2013;1(3)

96 **Table S1.** AICc model selection results for best fitting linear mixed effects model relating flight  
97 time across the ocean to tail and crosswind components from different altitudes. Wind  
98 components were derived from the NCEP/NOAA dataset (3 h, 32 km resolution; †) and were  
99 accessed through the Environmental-Data Automated Track Annotation Service provided by  
100 Movebank ([www.movebank.org](http://www.movebank.org); [2]). Altitude refers to geo-potential height and standard  
101 deviation (SD) reflects day to day variation in altitude associated with the vertical movement of  
102 air pressure within the atmosphere. W represents the Akaike weights and Cumulative W  
103 represents cumulative Akaike weights. LL refers to log-likelihood. <sup>2</sup> indicates a curvilinear term  
104 was included in the model.  
105

| Model                                                   | Altitude ± SD<br>(m) | K | AICc   | ΔAICc | W    | Cumulative<br>W | LL      |
|---------------------------------------------------------|----------------------|---|--------|-------|------|-----------------|---------|
| † tail                                                  | 164.23 ± 43.82       | 4 | 245.11 | 0     | 0.49 | 0.49            | -117.68 |
| † tail                                                  | 375.92 ± 44.09       | 4 | 245.88 | 0.77  | 0.33 | 0.83            | -118.07 |
| † tail                                                  | 591.62 ± 44.58       | 4 | 248.51 | 3.4   | 0.09 | 0.92            | -119.39 |
| † tail + cross + cross <sup>2</sup>                     | 811.76 ± 45.32       | 6 | 249.29 | 4.18  | 0.06 | 0.98            | -116.64 |
| † tail x cross + tail <sup>2</sup> + cross <sup>2</sup> | 1503.67 ± 49.82      | 8 | 252.39 | 7.29  | 0.01 | 0.99            | -114.41 |
| † tail x cross                                          | 1036.74 ± 46.31      | 6 | 254.58 | 9.47  | 0    | 1               | -119.29 |
| † tail + cross + cross <sup>2</sup>                     | 1267.11 ± 47.78      | 6 | 254.82 | 9.71  | 0    | 1               | -119.41 |
| † tail x cross + tail <sup>2</sup>                      | 2256.10 ± 57.79      | 7 | 260.53 | 15.43 | 0    | 1               | -120.47 |
| † tail                                                  | 1747.38 ± 52.41      | 4 | 263.32 | 18.22 | 0    | 1               | -126.79 |
| † tail                                                  | 1997.96 ± 54.97      | 4 | 263.51 | 18.4  | 0    | 1               | -126.88 |

|                |    |   |        |       |   |   |         |
|----------------|----|---|--------|-------|---|---|---------|
| † tail x cross | 10 | 6 | 263.66 | 18.55 | 0 | 1 | -123.83 |
| † tail x cross | 30 | 6 | 263.81 | 18.7  | 0 | 1 | -123.9  |
| Null           | NA | 3 | 268.05 | 22.94 | 0 | 1 | -130.52 |

---



106 **Table S2.** AICc model selection results for best fitting linear model relating flight time along the  
107 coast to tail and crosswind components from different altitudes. Wind components were derived  
108 from the NCEP/NOAA dataset (3 h, 32 km resolution; †) and were accessed through the  
109 Environmental-Data Automated Track Annotation Service provided by Movebank  
110 ([www.movebank.org](http://www.movebank.org); [2]). Altitude refers to geo-potential height and standard deviation (SD)  
111 reflects day to day variation in altitude associated with the vertical movement of air pressure  
112 within the atmosphere. W represents the Akaike weights and Cumulative W represents  
113 cumulative Akaike weights. LL refers to log-likelihood. <sup>2</sup> indicates a curvilinear term was  
114 included in the model.  
115

| Model                    | Altitude ± SD<br>(m) | K | AICc   | ΔAICc | W    | Cumulative<br>W | LL     |
|--------------------------|----------------------|---|--------|-------|------|-----------------|--------|
| † tail+tail <sup>2</sup> | 816.86 ± 45.70       | 4 | 171.83 | 0     | 0.65 | 0.65            | -80.58 |
| † tail+tail <sup>2</sup> | 1041.39 ± 46.55      | 4 | 174.09 | 2.26  | 0.21 | 0.86            | -81.71 |
| † tail+tail <sup>2</sup> | 597.11 ± 45.06       | 4 | 176.1  | 4.27  | 0.08 | 0.94            | -82.72 |
| † tail x cross           | 1507.43 ± 49.69      | 5 | 178.81 | 6.98  | 0.02 | 0.96            | -82.26 |
| † tail+tail <sup>2</sup> | 1271.32 ± 47.80      | 4 | 179.28 | 7.46  | 0.02 | 0.98            | -84.31 |
| † tail+tail <sup>2</sup> | 381.62 ± 44.52       | 4 | 180.71 | 8.88  | 0.01 | 0.98            | -85.02 |
| † tail+tail <sup>2</sup> | 170.65 ± 44.38       | 4 | 181.31 | 9.48  | 0.01 | 0.99            | -85.32 |
| † tail x cross           | 2000.88 ± 54.57      | 5 | 182.48 | 10.65 | 0    | 0.99            | -84.1  |
| † tail x cross           | 1750.50 ± 52.18      | 5 | 183.17 | 11.34 | 0    | 0.99            | -84.44 |
| † tail                   | 10                   | 3 | 183.2  | 11.37 | 0    | 1               | -87.85 |

|                            |                 |   |        |       |   |   |        |
|----------------------------|-----------------|---|--------|-------|---|---|--------|
| † tail x cross             | 2258.76 ± 57.19 | 5 | 183.3  | 11.47 | 0 | 1 | -84.51 |
| † tail + tail <sup>2</sup> | 30              | 3 | 184.16 | 12.33 | 0 | 1 | -88.33 |
| Null                       | NA              | 2 | 192.79 | 20.96 | 0 | 1 | -94.04 |

---

116 **Table S3.** Results for models describing the effects of age and flight stage on the tailwind  
 117 component experienced aloft. Models were fit with tailwind component measured at a pressure  
 118 level of 1000mbar for the ocean flight and 925 mbar for the coastal flight, with the tailwind  
 119 component measured from only 1000mbar for both flight stages, or with the tailwind component  
 120 measured from 925 mbar for both flight stages. All wind data was from the NCEP/NOAA  
 121 database and was accessed through the Environmental-Data Automated Track Annotation  
 122 Service provided by Movebank ([www.movebank.org](http://www.movebank.org); [2]).  
 123

| Model               | Parameter    | $\beta$ | SE   | df    | t     | P      |
|---------------------|--------------|---------|------|-------|-------|--------|
| 1000mbar + 925 mbar | Intercept    | 2.42    | 1.23 | 33.98 | 1.97  | 0.058  |
|                     | Age          | 3.49    | 1.31 | 15.48 | 2.66  | 0.017  |
|                     | Flight stage | -3.03   | 0.77 | 17.72 | -3.96 | 0.001  |
| 1000 mbar only      | Intercept    | 2.06    | 1.14 | 29.71 | 1.81  | 0.080  |
|                     | Age          | 3.46    | 1.34 | 21.22 | 2.59  | 0.017  |
|                     | Flight stage | -2.56   | 0.44 | 17.89 | -5.74 | <0.001 |
| 925 mbar only       | Intercept    | 2.40    | 1.36 | 31.72 | 1.76  | 0.087  |
|                     | Age          | 3.66    | 1.60 | 26.15 | 2.30  | 0.030  |
|                     | Flight stage | -3.10   | 0.65 | 18.57 | -4.79 | <0.001 |

124 **FIGURE CAPTIONS**

125

126 **Figure S1.** Map of Kent Is. depicting the locations and orientation of antennas on each station  
127 from 2009. Orientation of the antennas is relative to geographic north. The orientation of the  
128 southern-most receiving station is  $180^\circ$  and the western most antenna is oriented towards  $270^\circ$ .  
129 The two middle antennas are separated from the other two antennas and each other by  $30^\circ$  and  
130 are oriented towards  $210^\circ$  and  $240^\circ$ . The antenna at the middle and northern most station are  
131 shifted  $10^\circ$  and  $20^\circ$ , respectively, from the southern-most station. Antennas were numbered one  
132 through four. All three stations were synchronized such that antenna one at each of the stations  
133 was scanning at the same time, then antenna 2, 3, and 4, at which point, the cycle would repeat  
134 on the second VHF radio frequency, and then the third.

135

136 **Figure S2.** Rose diagrams (circular histograms) illustrating vanishing bearings of Savannah  
137 sparrows departing Kent Is. in (a) 2009 and (b) 2010. Vanishing bearing were measured and are  
138 illustrated in approximately 10 degree intervals and are based on the orientation of the last  
139 antenna to receive a signal from each bird before they flew out of range of the automated  
140 receivers on Kent Is. The labels along the  $90^\circ$  axis indicate the number of birds represented by  
141 each concentric circle. The solid black line and arrow represents the median direction of  
142 departure and the length of the arrow represents the amount of circular dispersion ( $\rho$ )  
143 multiplied by 15 (i.e., the maximum number of observations observed for an individual bin in  
144 each year).

145

146 **Figure S3.** Density plot of estimated detection distances for Savannah sparrows departing Kent  
147 Is. in 2010. Estimates were as calculated by multiplying the amount of time each bird was  
148 tracked once it departed Kent Is. by its groundspeed over the ocean. The hatched black line  
149 represents the median estimated detection distance (9.8 km).

150

151 **Figure S4.** Hypothetical wind triangles or vector addition diagrams illustrating (a) a positive  
152 tailwind component and (b) a negative tailwind component. Crosswind components are identical  
153 in both (a) and (b). Origin refers to where a bird started and destination refers where it is trying  
154 to get to. Track direction refers to a bird's trajectory from a place of origin relative to another  
155 reference point on the surface of the earth (destination). Groundspeed represents the speed at  
156 which the bird is flying over the ground. Wind direction and speed represent the direction the  
157 wind is blowing towards and its speed, respectively. Heading represents the direction in which a  
158 bird must fly to maintain a given track direction given wind speed and direction. Airspeed is the  
159 bird's flight speed in the absence of any winds. Speeds were measured in m/s.  $\beta$  refers to the  
160 difference between an individual's track direction and the wind direction ( $^{\circ}$ ).  $\alpha$  refers to the  
161 difference between an individual's track and heading direction.

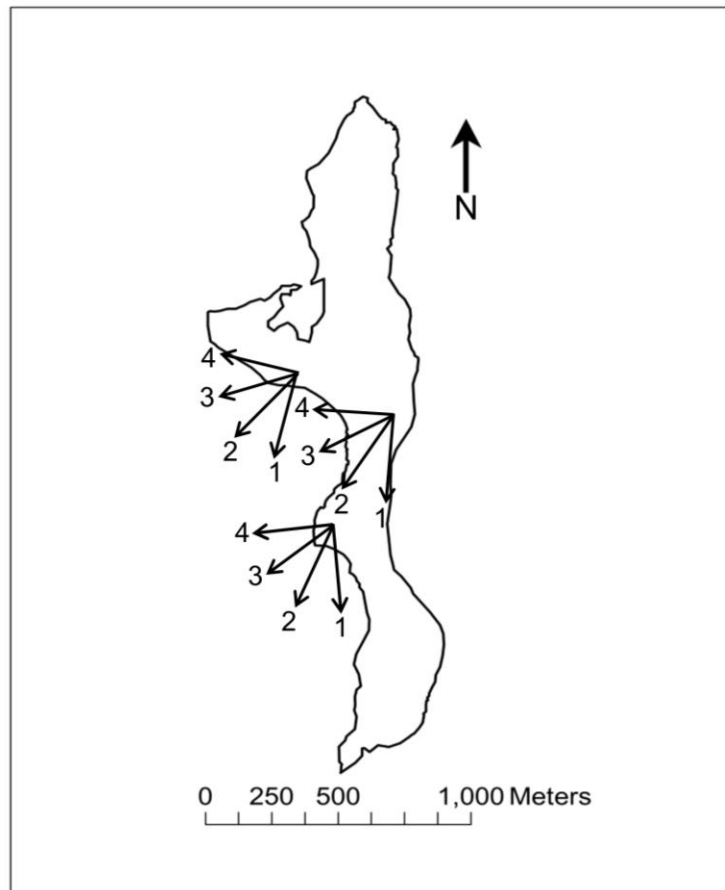

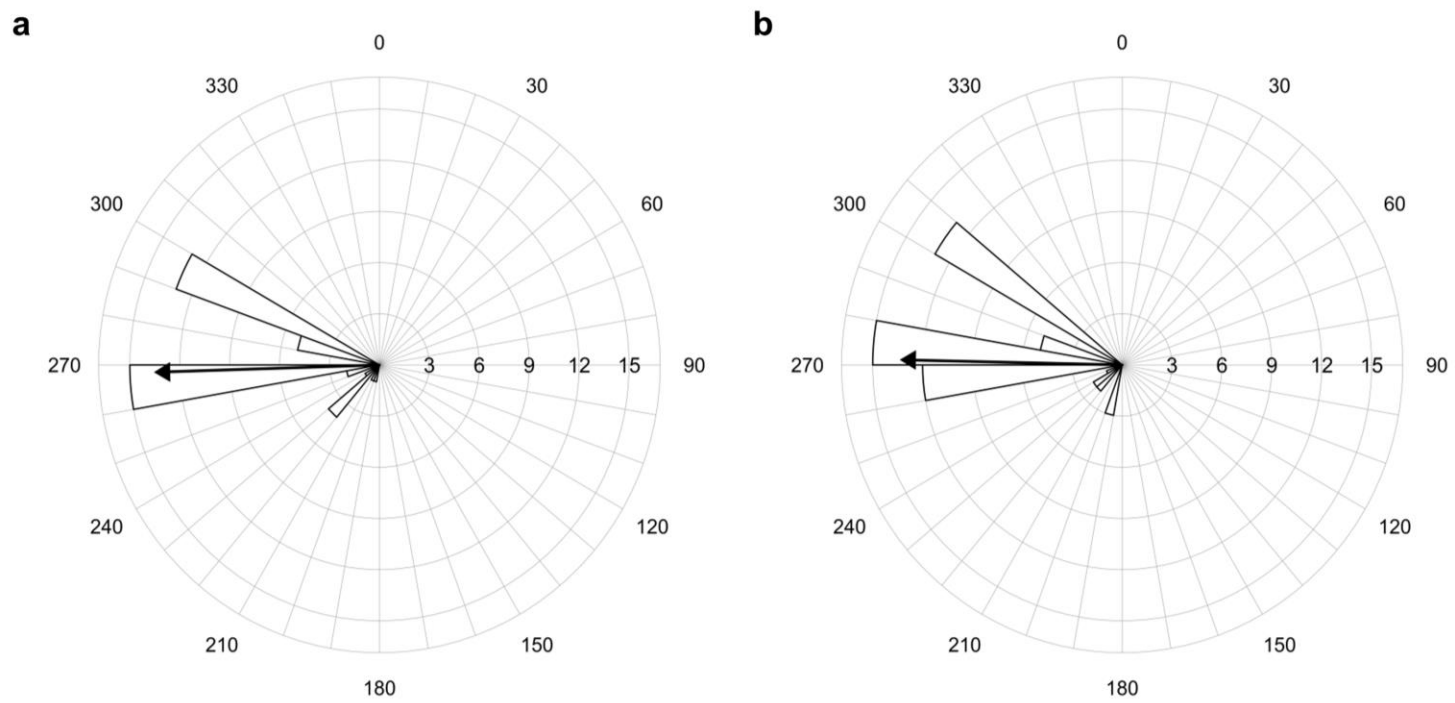

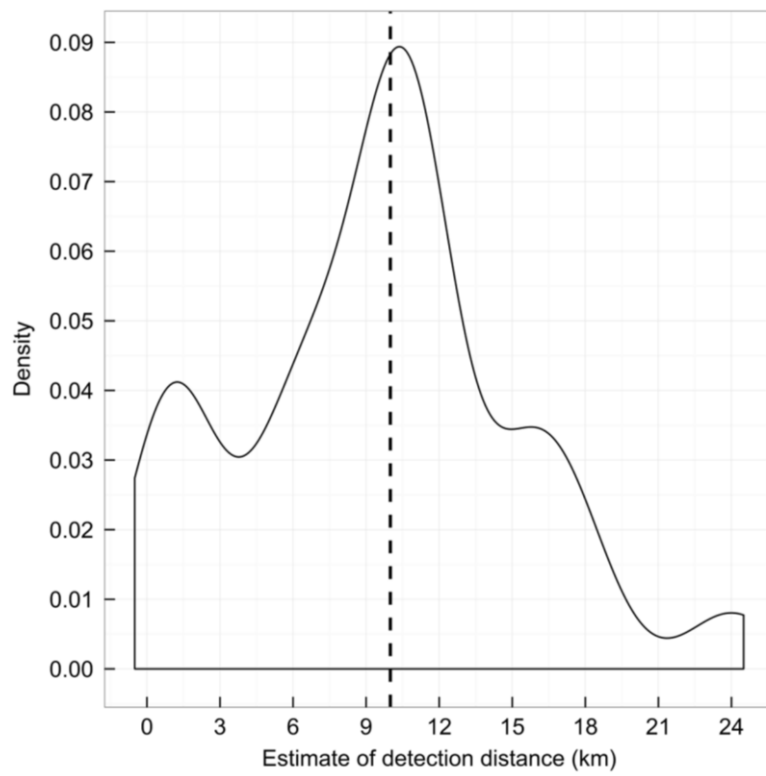



165 **Figure S4.**

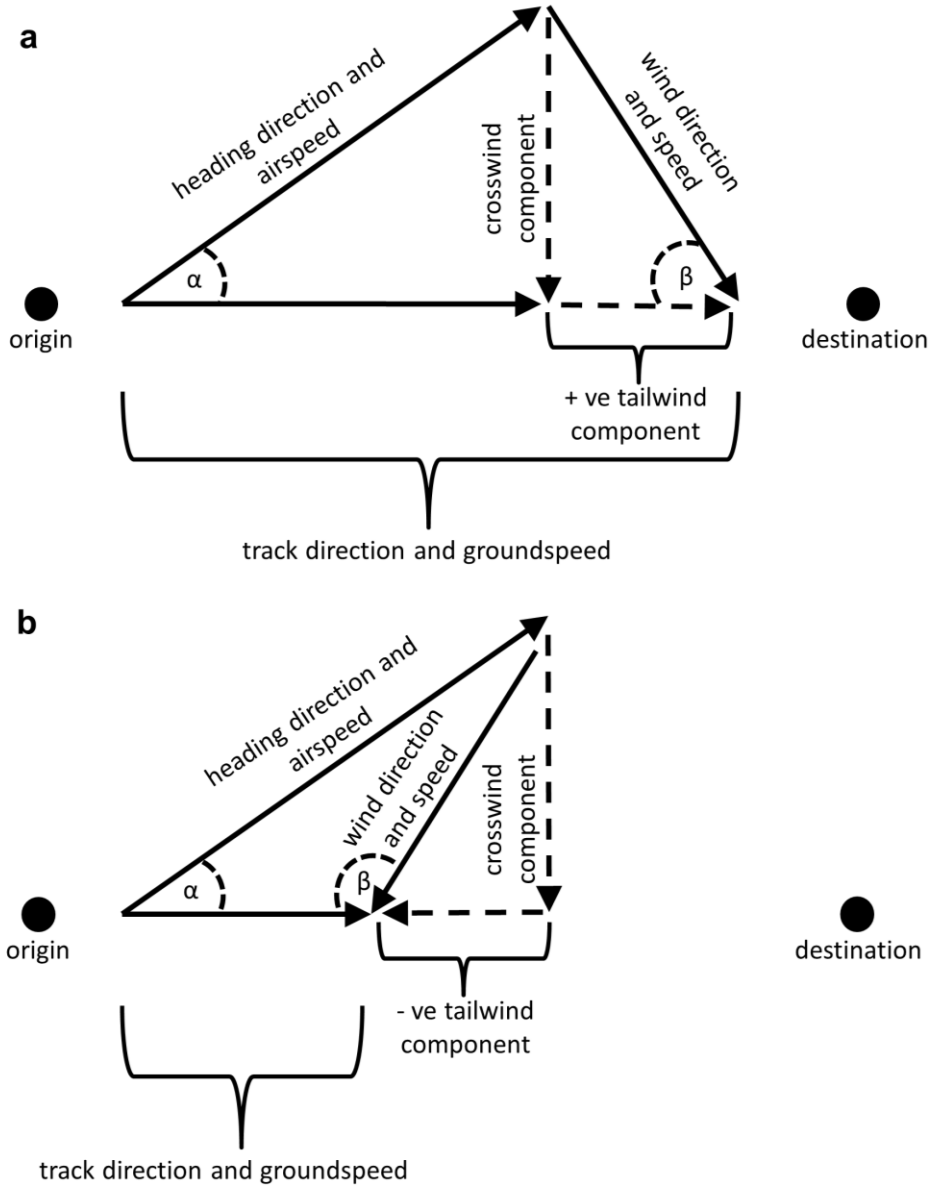

Supplement: 40462_2015_46_MOESM1_ESM.pdf [file 40462_2015_46_MOESM1_ESM.pdf]
